# Supplementary material for: New glycosylated derivatives of versipelostatin, the GRP78/Bip molecular chaperone down-regulator, from Streptomyces versipellis 4083-SVS6
Source: Royal Society of Chemistry journal article supplement (doi:10.1039/b817312e), 2009-01-01

## Supporting Information

### **New glycosylated derivatives of versipelostatin, the GRP78/Bip molecular chaperone down-regulator, from *Streptomyces versipellis* 4083–SVS6**

Ping Zhao,<sup>a</sup> Jun-ya Ueda,<sup>b</sup> Ikuko Kozono,<sup>b</sup> Shuhei Chijiwa,<sup>b</sup> Motoki Takagi,<sup>b</sup> Fumitaka Kudo,<sup>c</sup>  
Makoto Nishiyama,<sup>a</sup> Kazuo Shin-ya\*<sup>d</sup> and Tomohisa Kuzuyama\*<sup>a</sup>

<sup>a</sup>*Laboratory of Cell Biotechnology, Biotechnology Research Center, The University of Tokyo, 1-1-1 Yayoi, Bunkyo-ku, Tokyo 113-8657, Japan*

<sup>b</sup>*Biomedinal Information Research Center, Japan Biological Informatics Consortium (JBIC), 2-42 Aomi, Koto-ku, Tokyo 135-0064, Japan*

<sup>c</sup>*Department of Chemistry, Tokyo Institute of Technology, 2-12-1 Ookayama, Meguro-ku, Tokyo 152-8551, Japan*

<sup>d</sup>*National Institute of Advanced Industrial Science and Technology, 2-42 Aomi, Koto-ku, Tokyo 135-0064, Japan*

\*To whom correspondence should be addressed:

E-mail: [utkuz@mail.ecc.u-tokyo.ac.jp](mailto:utkuz@mail.ecc.u-tokyo.ac.jp) (T.K.), Tel: +81-3-5841-3073, Fax: +81-3-5841-8030.

## Index:

|                 |                                                                                                              |    |
|-----------------|--------------------------------------------------------------------------------------------------------------|----|
| <b>Table S1</b> | $^1\text{H}$ NMR (600 MHz) data for the aglycone moiety of versipelostatins B–E (2–5) -----                  | 3  |
| <b>Table S2</b> | $^1\text{H}$ NMR (600 MHz) data for VST (1) -----                                                            | 4  |
| <b>Fig. S1</b>  | $^1\text{H}$ NMR (600 MHz, $\text{CDCl}_3$ ) spectrum of versipelostatin B (2) -----                         | 5  |
| <b>Fig. S2</b>  | $^{13}\text{C}$ NMR (150 MHz, $\text{CDCl}_3$ ) spectrum of versipelostatin B (2) -----                      | 6  |
| <b>Fig. S3</b>  | HSQC (600 MHz, $\text{CDCl}_3$ ) spectrum of versipelostatin B (2) -----                                     | 7  |
| <b>Fig. S4</b>  | DQF-COSY (600 MHz, $\text{CDCl}_3$ ) spectrum of versipelostatin B (2) -----                                 | 8  |
| <b>Fig. S5</b>  | HMBC (600 MHz, $\text{CDCl}_3$ ) spectrum of versipelostatin B (2) -----                                     | 9  |
| <b>Fig. S6</b>  | $^1\text{H}$ NMR (600 MHz, $\text{C}_5\text{D}_5\text{N}$ ) spectrum of versipelostatin C (3) -----          | 10 |
| <b>Fig. S7</b>  | $^{13}\text{C}$ NMR (150 MHz, $\text{C}_5\text{D}_5\text{N}$ ) spectrum of versipelostatin C (3) -----       | 11 |
| <b>Fig. S8</b>  | HSQC (600 MHz, $\text{C}_5\text{D}_5\text{N}$ ) spectrum of versipelostatin C (3) -----                      | 12 |
| <b>Fig. S9</b>  | DQF-COSY (600 MHz, $\text{C}_5\text{D}_5\text{N}$ ) spectrum of versipelostatin C (3) -----                  | 13 |
| <b>Fig. S10</b> | HMBC (600 MHz, $\text{C}_5\text{D}_5\text{N}$ ) spectrum of versipelostatin C (3) -----                      | 14 |
| <b>Fig. S11</b> | $^1\text{H}$ NMR (600 MHz, $\text{CDCl}_3/\text{CD}_3\text{OD}$ ) spectrum of versipelostatin D (4) -----    | 15 |
| <b>Fig. S12</b> | $^{13}\text{C}$ NMR (150 MHz, $\text{CDCl}_3/\text{CD}_3\text{OD}$ ) spectrum of versipelostatin D (4) ----- | 16 |
| <b>Fig. S13</b> | HSQC (600 MHz, $\text{CDCl}_3/\text{CD}_3\text{OD}$ ) spectrum of versipelostatin D (4) -----                | 17 |
| <b>Fig. S14</b> | DQF-COSY (600 MHz, $\text{CDCl}_3/\text{CD}_3\text{OD}$ ) spectrum of versipelostatin D (4) ---              | 18 |
| <b>Fig. S15</b> | HMBC (600 MHz, $\text{CDCl}_3/\text{CD}_3\text{OD}$ ) spectrum of versipelostatin D (4) -----                | 19 |
| <b>Fig. S16</b> | $^1\text{H}$ NMR (600 MHz, $\text{CDCl}_3$ ) spectrum of versipelostatin E (5) -----                         | 20 |
| <b>Fig. S17</b> | $^{13}\text{C}$ NMR (150 MHz, $\text{CDCl}_3$ ) spectrum of versipelostatin E (5) -----                      | 21 |
| <b>Fig. S18</b> | HSQC (600 MHz, $\text{CDCl}_3$ ) spectrum of versipelostatin E (5) -----                                     | 22 |
| <b>Fig. S19</b> | DQF-COSY (600 MHz, $\text{CDCl}_3$ ) spectrum of versipelostatin E (5) -----                                 | 23 |
| <b>Fig. S20</b> | HMBC (600 MHz, $\text{CDCl}_3$ ) spectrum of versipelostatin E (5) -----                                     | 24 |

**Table S1**  $^1\text{H}$  NMR (600 MHz) data for the aglycone moiety of versipelostatins B–E (2–5)

|    | <b>2</b>                                 | <b>3</b>                                 | <b>4</b>                                 | <b>5</b>                                 |
|----|------------------------------------------|------------------------------------------|------------------------------------------|------------------------------------------|
| #  | $\delta$ (multi, $J$ in Hz) <sup>a</sup> | $\delta$ (multi, $J$ in Hz) <sup>b</sup> | $\delta$ (multi, $J$ in Hz) <sup>c</sup> | $\delta$ (multi, $J$ in Hz) <sup>a</sup> |
| 5  | 2.43 (m)                                 | 2.83 (m)                                 | 2.39 (m)                                 | 2.43 (m)                                 |
| 6  | 2.45 (m)                                 | 2.72 (m)                                 | 2.48 (m)                                 | 2.45 (m)                                 |
| 8  | 2.48 (m)                                 | 2.85 (m)                                 | 2.40 (m)                                 | 2.41 (m)                                 |
|    | 3.02 (dd, 15.0, 6.0)                     | 3.31 (dd, 15.0, 6.0)                     | 2.98 (dd, 15.0, 6.0)                     | 3.02 (dd, 15.0, 6.0)                     |
| 9  | 3.82 (m)                                 | 4.18 (m)                                 | 3.75 (m)                                 | 3.83 (m)                                 |
| 10 | 2.31 (m)                                 | 2.60 (m)                                 | 2.22 (m)                                 | 2.32 (m)                                 |
| 11 | 5.85 (br s)                              | 6.37 (br d, 6.6)                         | 5.88 (br s)                              | 5.85 (br s)                              |
| 13 | 3.10 (s)                                 | 4.48 (m)                                 | 3.06 (s)                                 | 3.09 (s)                                 |
| 15 | 5.12 (d, 10.3)                           | 6.03 (d, 9.3)                            | 5.15 (d, 9.8)                            | 5.14 (d, 10.3)                           |
| 16 | 2.31 (m)                                 | 2.66 (m)                                 | 2.36 (m)                                 | 2.30 (m)                                 |
| 17 | 0.62 (t, 11.0)                           | 1.01 (m)                                 | 0.66 (t, 11.0)                           | 0.61 (t, 12.0)                           |
|    | 1.58 (m)                                 | 1.56 (m)                                 | 1.59 (m)                                 | 1.59 (m)                                 |
| 18 | 1.97 (m)                                 | 2.11 (m)                                 | 1.96 (m)                                 | 1.96 (m)                                 |
| 19 | 3.21 (m)                                 | 3.22 (m)                                 | 3.22 (m)                                 | 3.22 (m)                                 |
| 20 | 1.63 (m)                                 | 1.43 (m)                                 | 1.63 (m)                                 | 1.62 (m)                                 |
| 21 | 1.11 (m)                                 | 1.29 (m)                                 | 1.16 (m)                                 | 1.13 (m)                                 |
|    | 1.52 (m)                                 | 1.72 (m)                                 | 1.53 (m)                                 | 1.55 (m)                                 |
| 22 | 1.36 (m)                                 | 1.49 (m)                                 | 1.39 (m)                                 | 1.35 (m)                                 |
|    | 1.60 (m)                                 |                                          | 1.62 (m)                                 | 1.62 (m)                                 |
| 23 | 1.27 (m)                                 | 1.79 (m)                                 | 1.28 (m)                                 | 1.28 (m)                                 |
|    | 1.56 (m)                                 |                                          | 1.57 (m)                                 | 1.57 (m)                                 |
| 25 | 5.29 (br s)                              | 5.67 (br s)                              | 5.34 (br s)                              | 5.28 (br s)                              |
| 27 | 2.39 (m)                                 | 2.37 (m)                                 | 2.39 (m)                                 | 2.39 (m)                                 |
| 28 | 1.76 (dd, 13.7, 6.9)                     | 1.86 (m)                                 | 1.77 (m)                                 | 1.77 (dd, 13.7, 6.8)                     |
|    | 2.25 (dd, 13.7, 6.9)                     | 2.74 (m)                                 | 2.09 (br d, 12.7)                        | 2.23 (dd, 13.7, 6.8)                     |
| 31 | 2.12 (q, 7.6)                            | 2.49 (m)                                 | 2.05 (q, 7.6)                            | 2.15 (q, 7.6)                            |
|    | 2.54 (q, 7.6)                            | 2.88 (m)                                 | 2.49 (m)                                 | 2.55 (q, 7.6)                            |
| 32 | 0.95 (t, 6.2)                            | 1.32 (t, 7.8)                            | 0.92 (t, 5.8)                            | 0.94 (t, 6.2)                            |
| 33 | 0.95 (d, 6.2)                            | 1.17 (d, 7.3)                            | 1.00 (d, 7.2)                            | 0.95 (d, 6.2)                            |
| 34 | 1.66 (s)                                 | 1.74(s)                                  | 1.66 (s)                                 | 1.64 (s)                                 |
| 35 | 1.88 (q, 6.9)                            | 2.06 (m)                                 | 1.93 (q, 7.8)                            | 1.88 (q, 7.6)                            |
|    | 1.95 (q, 6.9)                            | 2.13 (m)                                 | 1.95 (q, 7.8)                            | 1.90 (q, 7.6)                            |
| 36 | 0.91 (t, 6.9)                            | 1.11 (t, 8.3)                            | 0.94 (t, 7.8)                            | 0.90 (t, 7.6)                            |
| 37 | 3.42 (dd, 11.7, 3.5)                     | 3.80 (dd, 12.0, 8.8)                     | 3.39 (dd, 11.5, 4.9)                     | 3.41 (dd, 11.3, 4.4)                     |
|    | 3.53 (dd, 10.3, 4.1)                     | 4.01 (dd, 12.0, 3.9)                     | 3.51 (dd, 11.5, 4.9)                     | 3.56 (dd, 11.3, 4.5)                     |
| 38 | 0.93 (d, 6.2)                            | 1.13 (d, 7.3)                            | 0.98 (d, 7.3)                            | 0.93 (d, 6.2)                            |
| 39 | 0.90 (d, 7.6)                            | 0.55 (br s)                              | 0.94 (d, 7.8)                            | 0.91 (d, 7.6)                            |
| 40 | 1.03 (s)                                 | 1.25 (s)                                 | 1.04 (s)                                 | 1.03 (s)                                 |
| 41 | 1.69 (s)                                 | 2.12 (s)                                 | 1.69 (s)                                 | 1.67 (s)                                 |
| 42 | 1.06 (d, 6.9)                            | 1.21 (d, 7.3)                            | 1.07 (d, 6.8)                            | 1.06 (d, 6.9)                            |

Data were recorded in  $^a\text{CDCl}_3$  for **2** and **5**,  $^b\text{C}_5\text{D}_5\text{N}$  for **3**, and  $^c\text{CDCl}_3/\text{CD}_3\text{OD}$  for **4**.

**Table S2**  $^1\text{H}$  NMR (600 MHz) data for VST (1)

| no. | $\delta^a$                | $\delta^b$                  | no.                  | $\delta^a$                 | $\delta^b$                 |
|-----|---------------------------|-----------------------------|----------------------|----------------------------|----------------------------|
| 5   | 2.40 (m)                  | 2.88 (t, 10.8)              | 38                   | 0.91                       | 1.11 (d, 6.6)              |
| 6   | 2.45 (m)                  | 2.73 (m)                    | 39                   | 0.88                       | 0.66 (br d, 6.1)           |
| 8   | 2.41 (m)                  | 2.93 (m)                    | 40                   | 1.01 (s)                   | 1.26 (s)                   |
|     | 2.98 (dd, 14.0, 7.0)      | 3.30 (dd, 14.2, 5.9)        |                      |                            |                            |
| 9   | 3.77 (m)                  | 4.11 (td, 9.8, 6.1)         | 41                   | 1.66 (s)                   | 1.94 (br s)                |
| 10  | 2.28 (m)                  | 2.69 (br t, 11.7)           | 42                   | 1.03 (d, 7)                | 1.21 (d, 7.3)              |
| 11  | 5.83 (br s)               | 6.39 (br s)                 | $\beta$ -D-Dig       |                            |                            |
| 13  | 3.06 (s)                  | 4.21 (m)                    | 1'                   | 4.77 (d, 8.3)              | 5.22 (m)                   |
| 15  | 5.09 (d, 9.6)             | 5.96 (d, 9.5)               | 2'                   | 1.65 (m), 2.09 (dd, 10, 3) | 1.95 (m), 2.41 (m)         |
| 16  | 2.28 (m)                  | 2.73 (m)                    | 3'                   | 4.04 (br s)                | 4.55 (q, 2.7)              |
| 17  | 0.59 (t, 11.0), 1.59 (m)  | 0.90 (br t, 12.6), 1.74 (m) | 4'                   | 3.20 (dd, 10, 3)           | 3.48 (dd, 9.5, 2.4)        |
| 18  | 1.93 (m)                  | 2.09 (m)                    | 5'                   | 3.77 (dq, 10, 6.5)         | 4.29 (m)                   |
| 19  | 3.21 (m)                  | 3.10 (br d, 4.2)            | 6'                   | 1.17 (d, 6.5)              | 1.36 (d, 6.1)              |
| 20  | 1.61 (m)                  | 1.43 (m)                    | $\alpha$ -L-Ole      |                            |                            |
| 21  | 1.11 (m), 1.51 (m)        | 1.28 (m), 1.72 (m)          | 1''                  | 4.92 (d, 2)                | 5.15 (m)                   |
| 22  | 1.33 (m), 1.58 (m)        | 1.47 (m)                    | 2''                  | 1.53 (m), 2.11 (dd, 12, 4) | 1.65 (td, ), 2.38 (m)      |
| 23  | 1.26 (m), 1.53 (m)        | 1.80 (m)                    | 3''                  | 3.46 (dd, 12, 10)          | 3.71 (ddd, 10.9, 8.9, 4.5) |
| 25  | 5.25 (br s)               | 5.52 (br s)                 | 4''                  | 3.27 (t, 10)               | 3.67 (t, 9.3)              |
| 27  | 2.37 (m)                  | 2.40 (m)                    | 5''                  | 3.61 (dq, 10, 6.5)         | 4.31 (m)                   |
| 28  | 1.74 (dd, 14.0, 7.0)      | 1.97 (m)                    | 6''                  | 1.24 (d, 6.5)              | 1.55 (d, 6.4)              |
|     | 2.20 (dd, 14.0, 7.0)      | 2.57 (m)                    |                      |                            |                            |
| 31  | 2.11 (q, 8.0)             | 2.49 (pentet, 7.5)          | 3''-OCH <sub>3</sub> | 3.36 (s)                   | 3.18 (s)                   |
|     | 2.50 (q, 8.0)             | 2.94 (m)                    |                      |                            |                            |
| 32  | 0.91                      | 1.35 (t, 7.8)               | $\beta$ -D-Dig       |                            |                            |
| 33  | 0.92                      | 1.16 (d, 6.6)               | 1'''                 | 5.01 (d, 8.3)              | 5.66 (dd, 9.5, 1.7)        |
| 34  | 1.63 (s)                  | 1.73 (s)                    | 2'''                 | 1.61 (m), 2.09 (dd, 10, 3) | 1.95 (m), 2.45(m)          |
| 35  | 1.87 (q, 7) , 1.92 (q, 7) | 2.14 (m), 2.19 (m)          | 3'''                 | 4.04 (br s)                | 4.45 (q, 2.9)              |
| 36  | 0.88                      | 1.07 (t, 7.5)               | 4'''                 | 3.21 (dd, 10, 3)           | 3.61 (dd, 9.5, 3.0)        |
| 37  | 3.41 (dd, 10, 4)          | 3.77 (dd, 10.5, 7.3)        | 5'''                 | 3.63 (dq, 10, 6.5)         | 4.23 (m)                   |
|     | 3.50 (dd, 10, 4)          | 4.01 (dd, 10.5, 3.3)        | 6'''                 | 1.22 (d, 6.5)              | 1.54 (d, 6.1)              |

<sup>a</sup> in CDCl<sub>3</sub>, <sup>b</sup> in C<sub>5</sub>D<sub>5</sub>N. Dig: digitoxopyranosyl; Ole: oleandropyranosyl.

**Fig. S1**  $^1\text{H}$  NMR (600 MHz,  $\text{CDCl}_3$ ) spectrum of versipelostatin B (2)

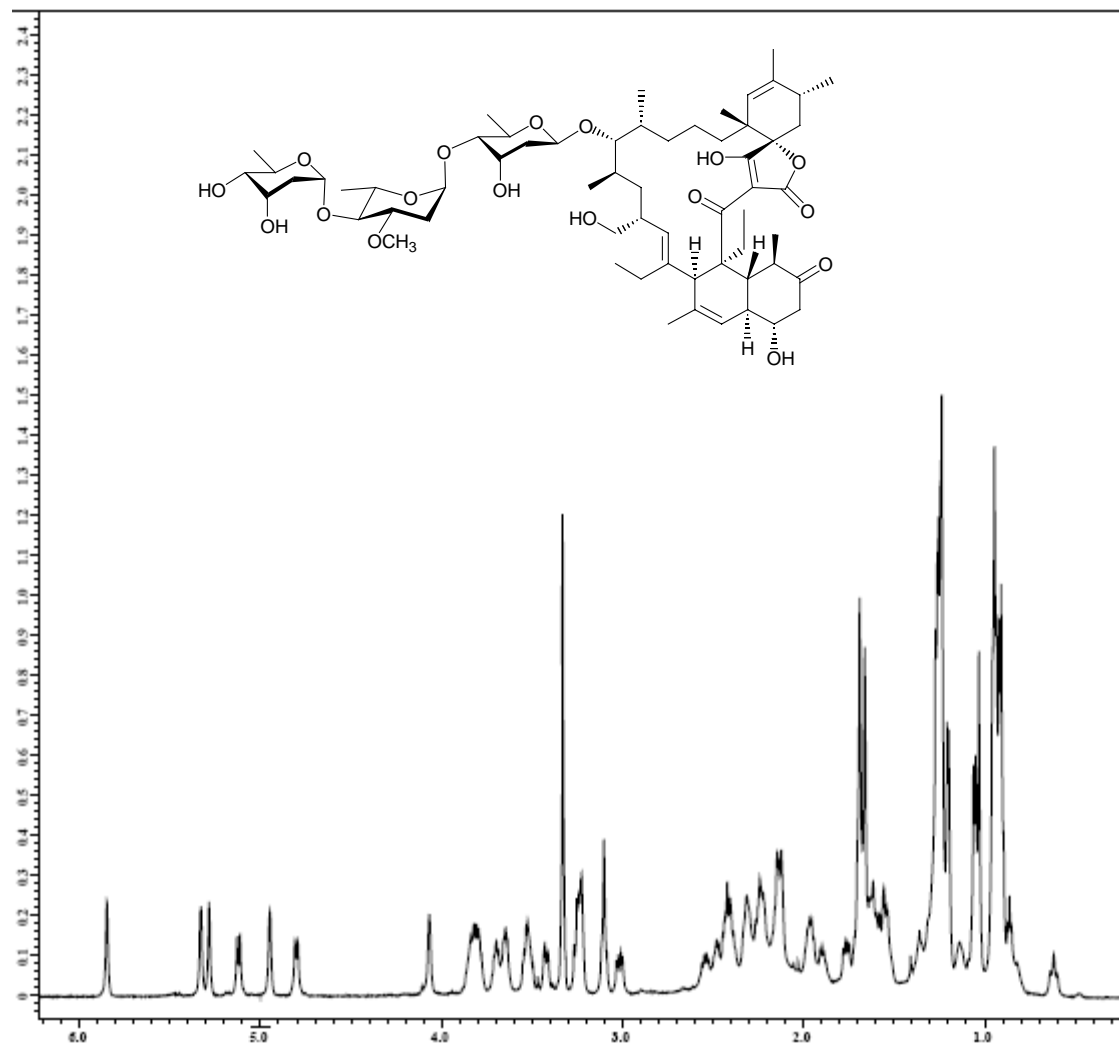

**Fig. S2**  $^{13}\text{C}$  NMR (150 MHz,  $\text{CDCl}_3$ ) spectrum of versipelostatin B (2)

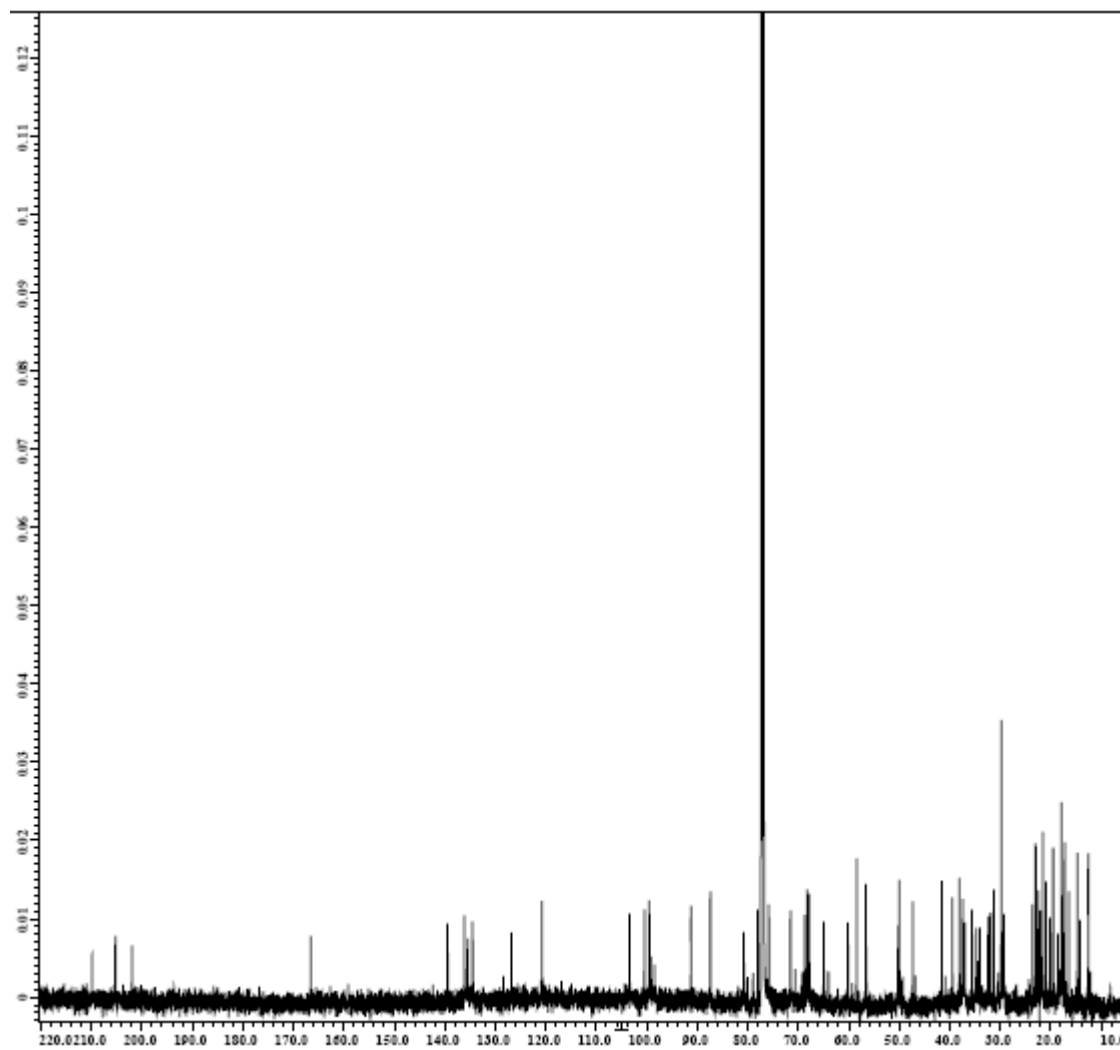

**Fig. S3 HSQC (600 MHz, CDCl<sub>3</sub>) spectrum of versipelostatin B (2)**

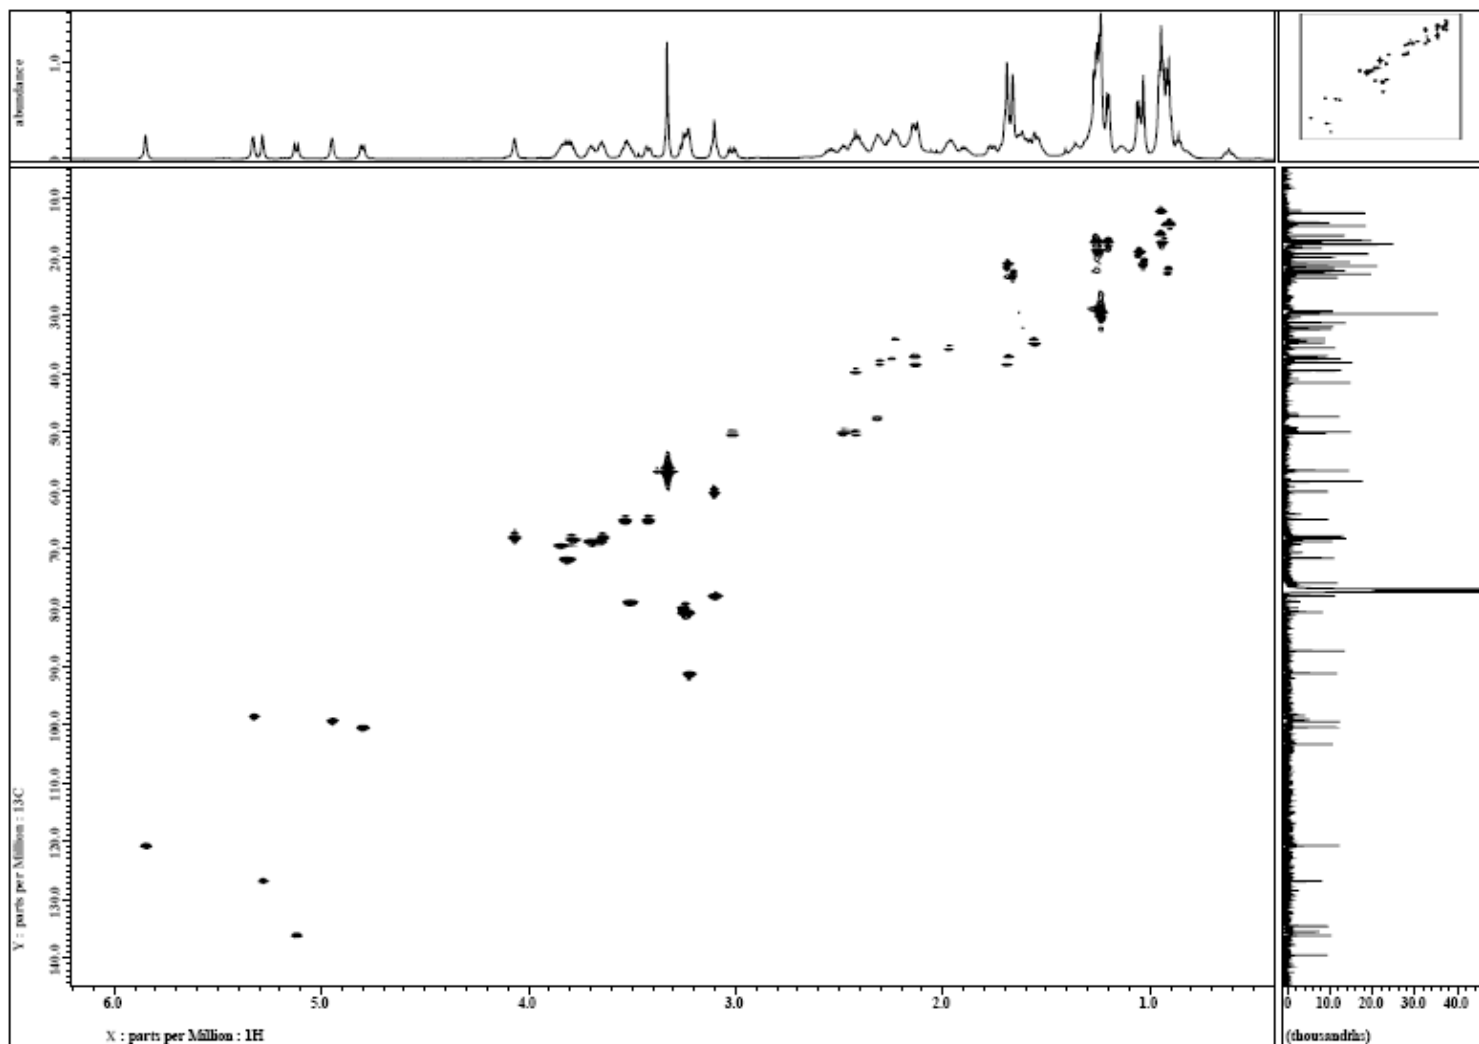

**Fig. S4 DQF-COSY (600 MHz, CDCl<sub>3</sub>) spectrum of versipelostatin B (2)**

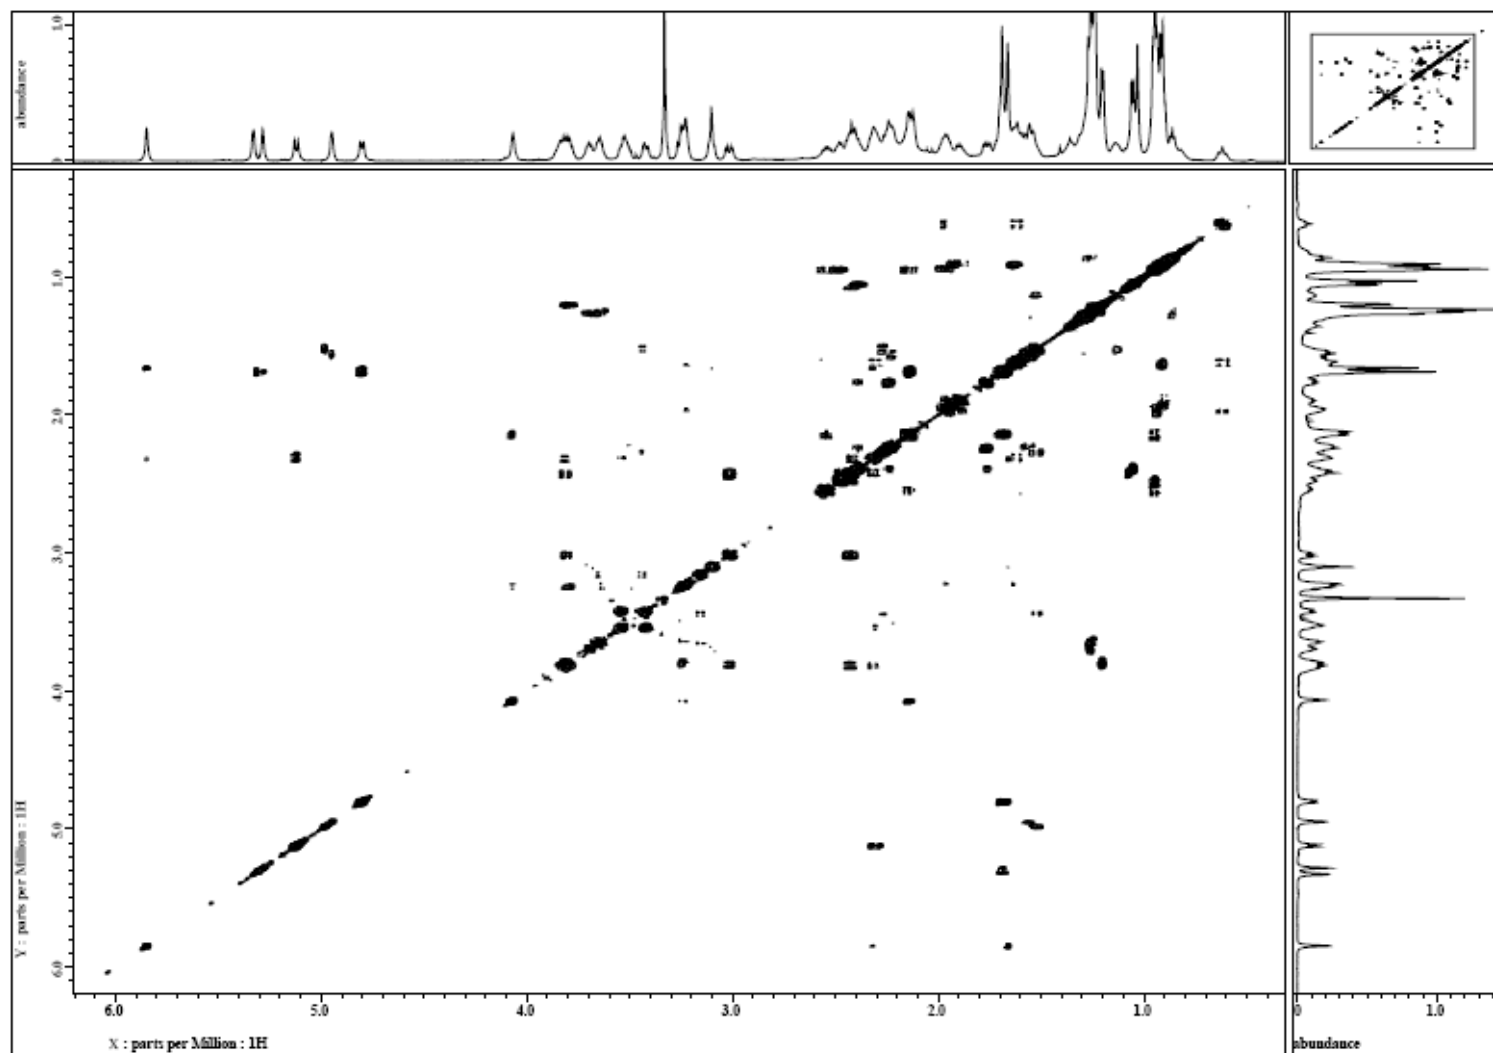



**Fig. S5** HMBC (600 MHz, CDCl<sub>3</sub>) spectrum of versipelostatin B (2)

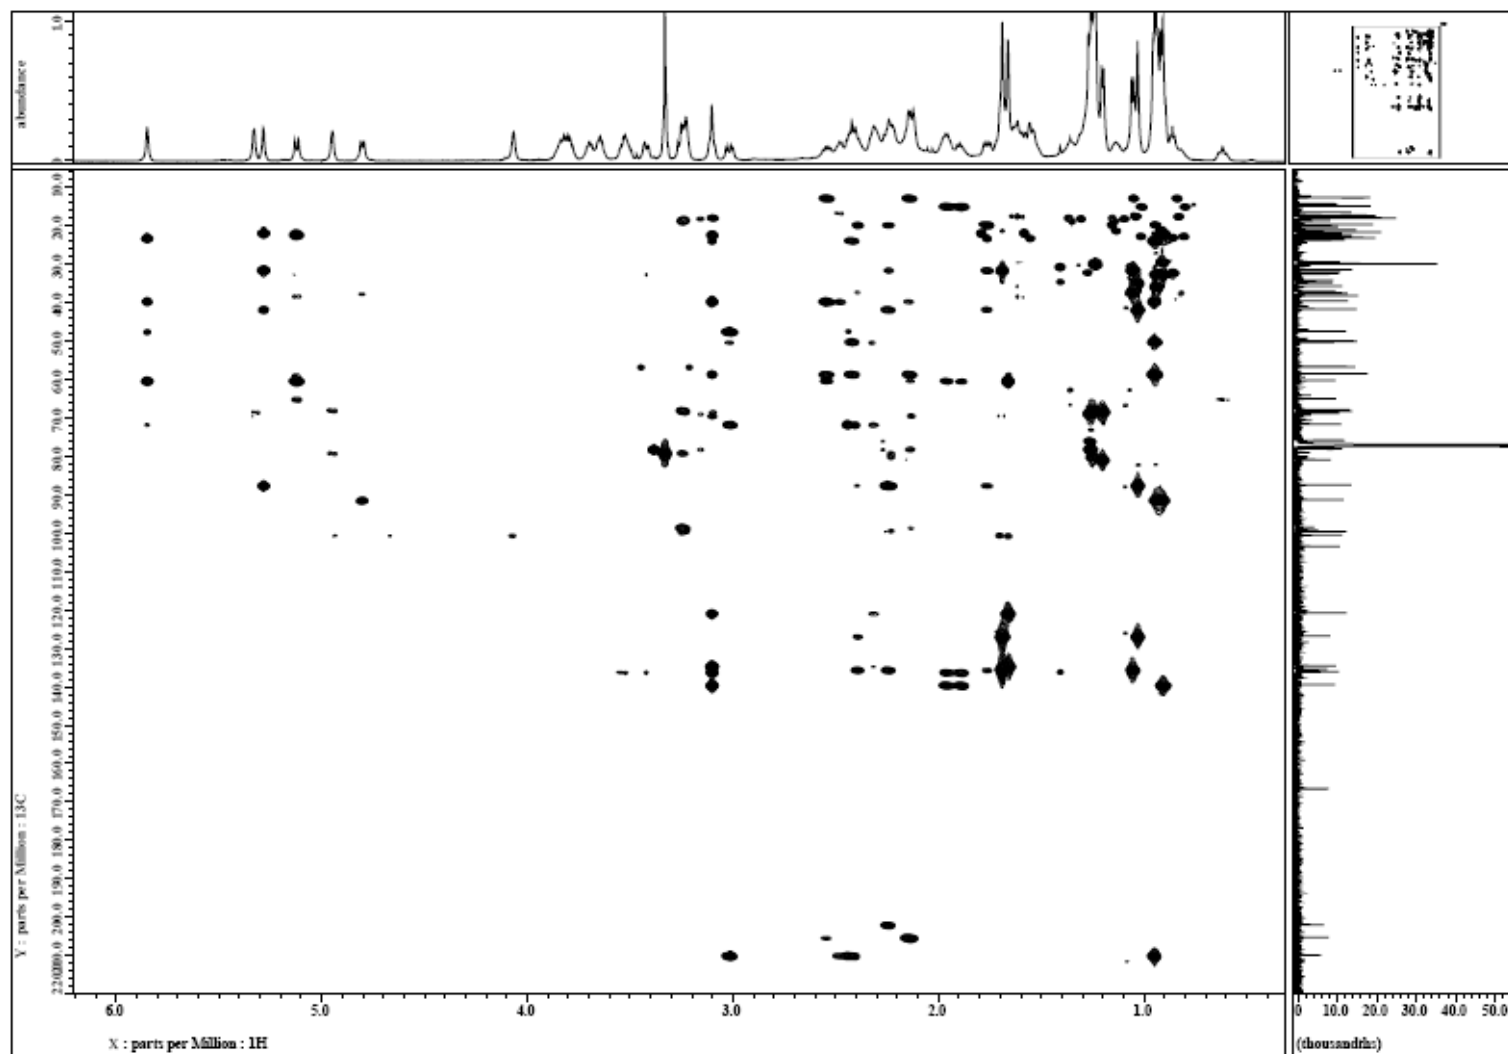

**Fig. S6**  $^1\text{H}$  NMR (600 MHz,  $\text{C}_5\text{D}_5\text{N}$ ) spectrum of versipelostatin C (3)

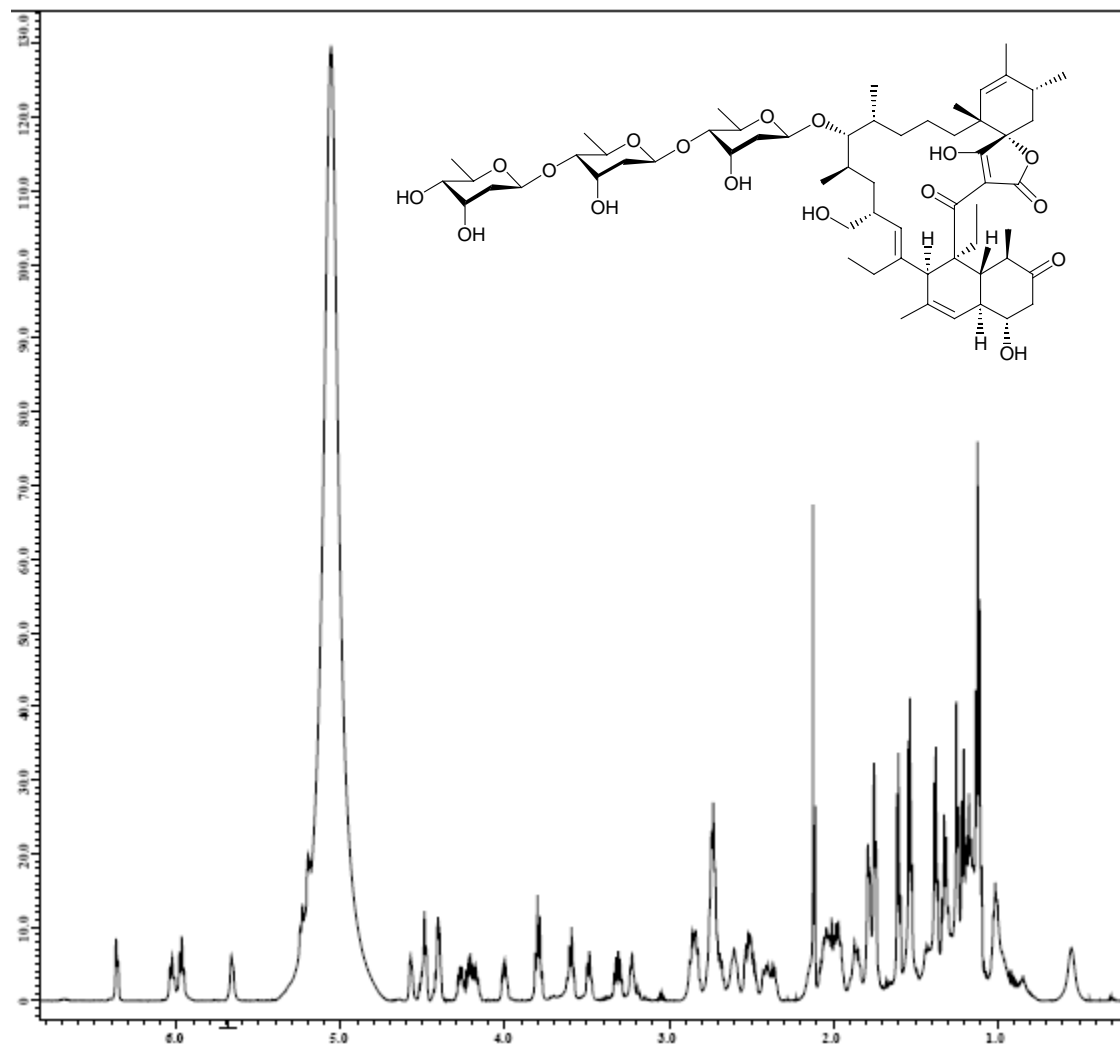

**Fig. S7**  $^{13}\text{C}$  NMR (150 MHz,  $\text{C}_5\text{D}_5\text{N}$ ) spectrum of versipelostatin C (3)

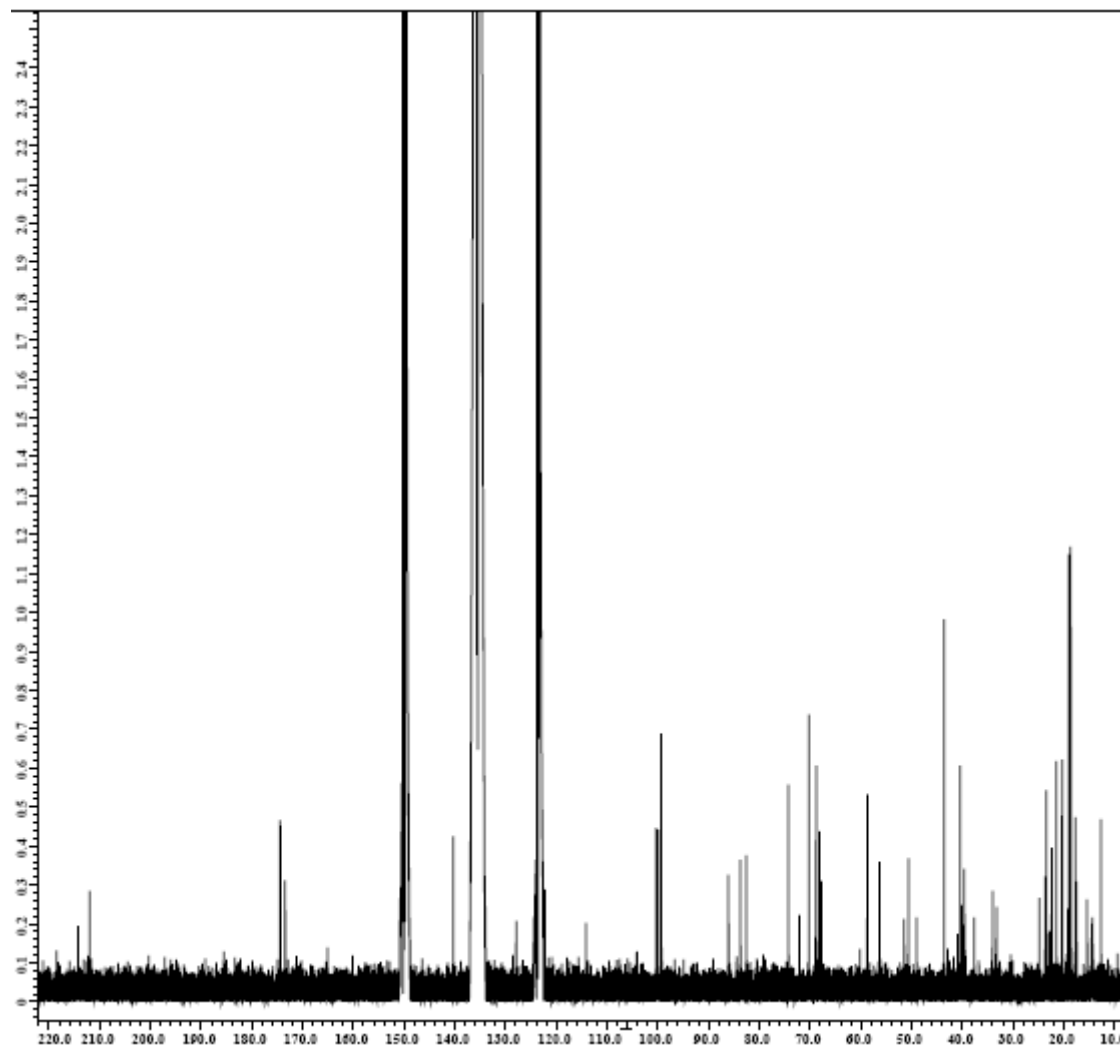

**Fig. S8** HSQC (600 MHz, C<sub>5</sub>D<sub>5</sub>N) spectrum of versipelostatin C (3)

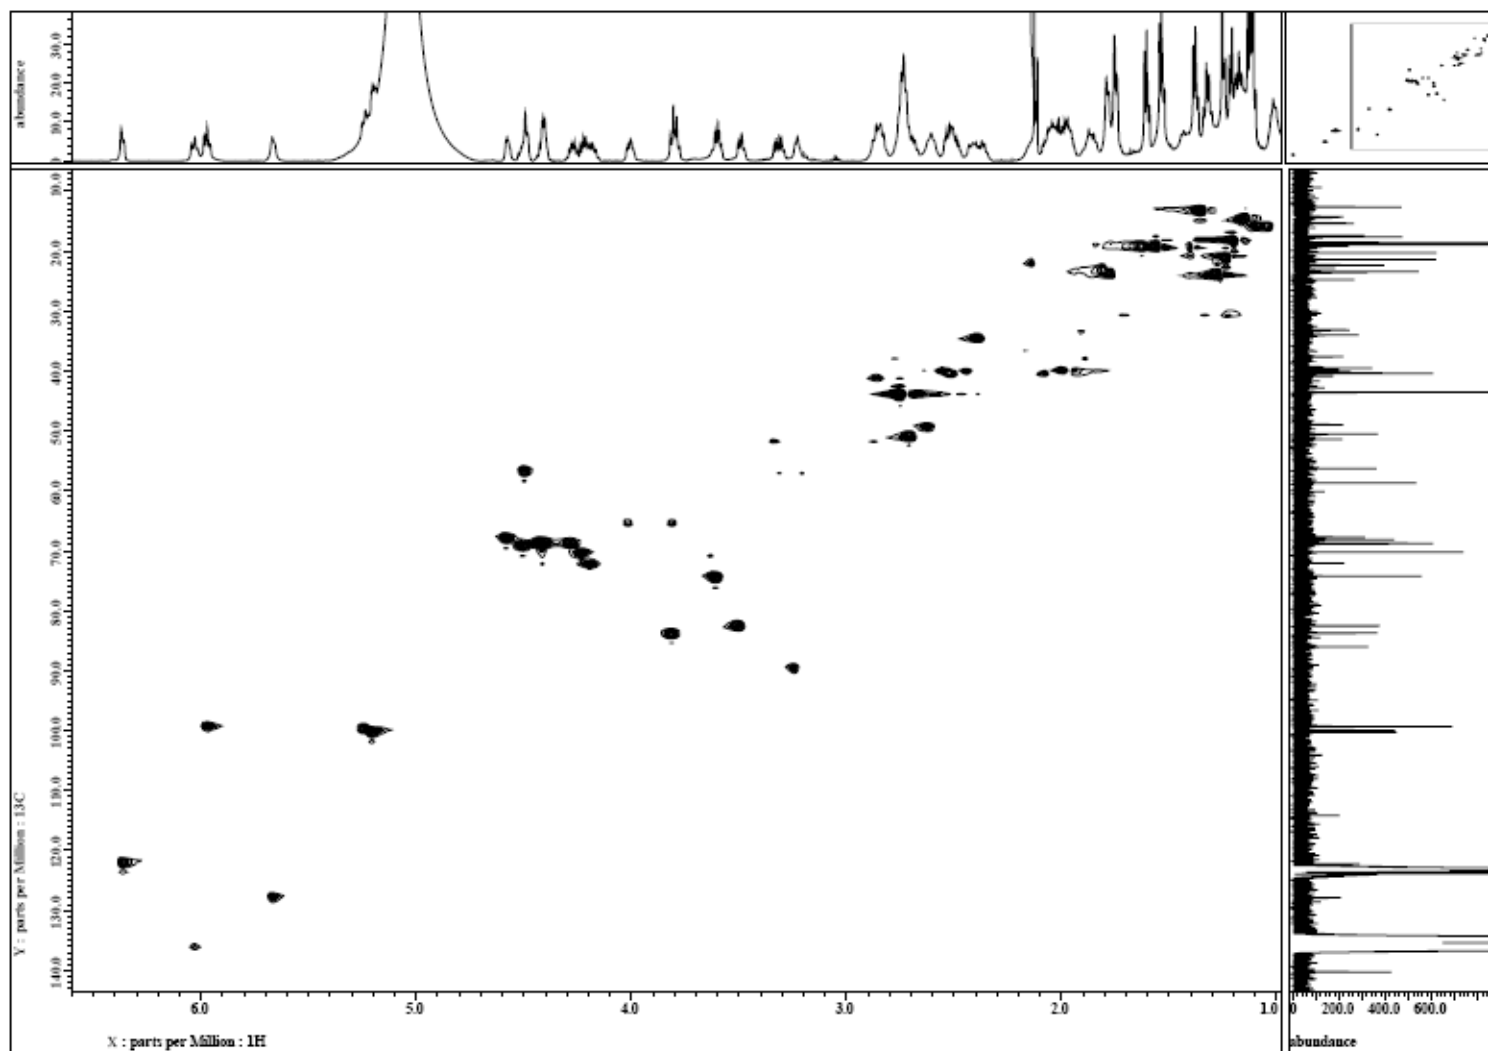

**Fig. S9** DQF-COSY (600 MHz,  $C_5D_5N$ ) spectrum of versipelostatin C (3)

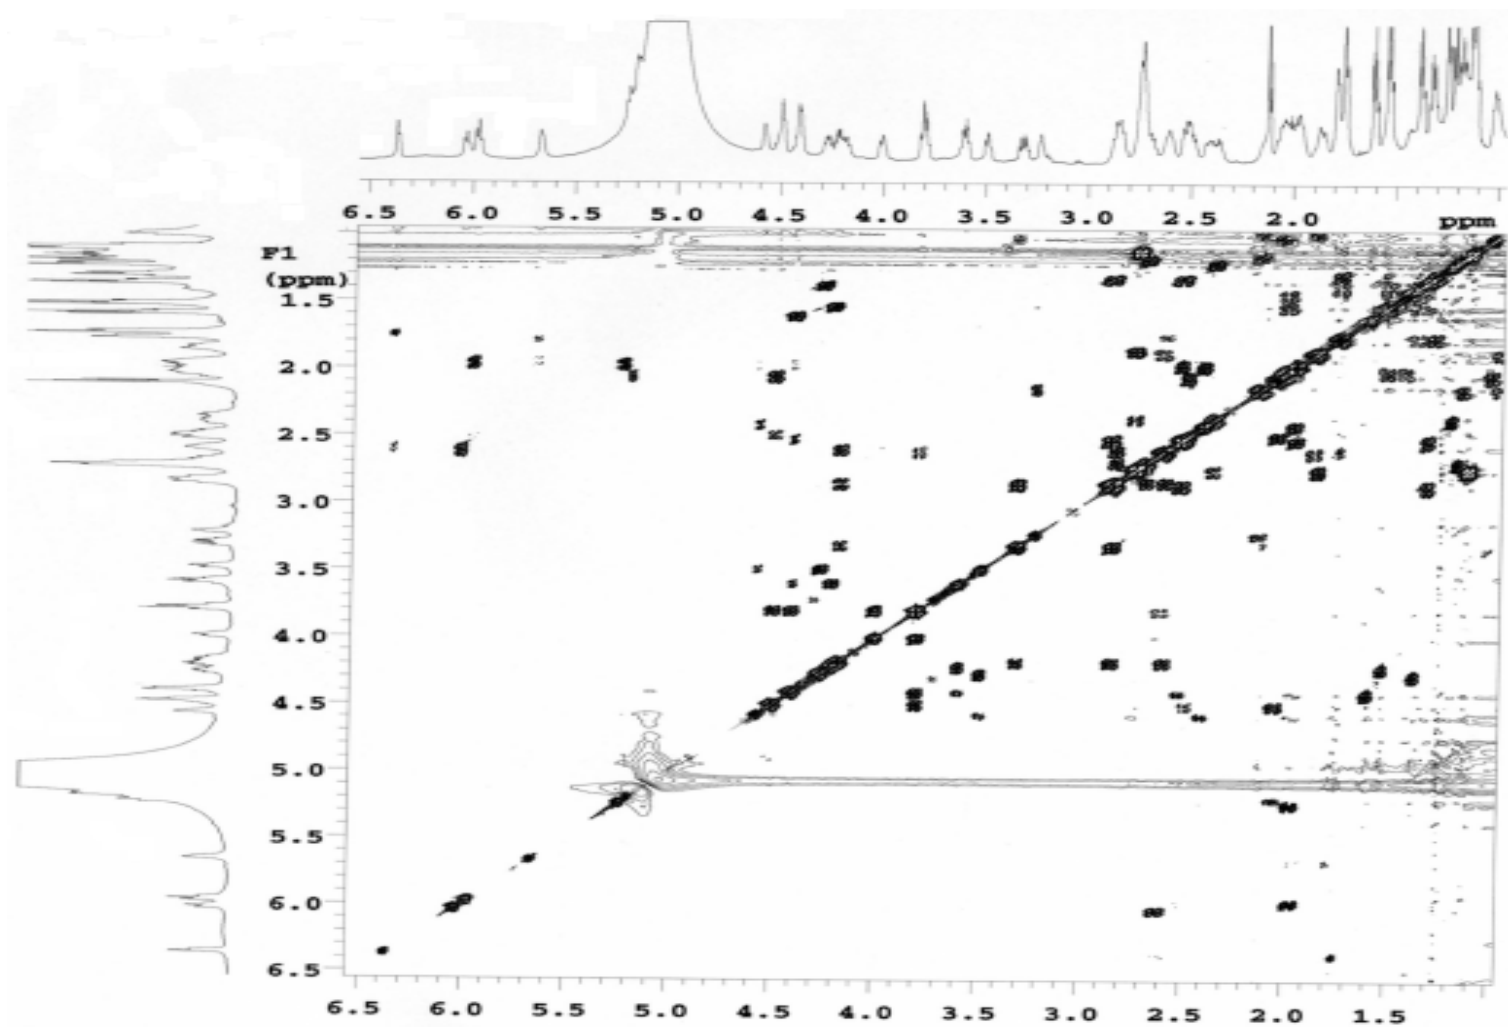

Fig. S10 HMBC (600 MHz, C<sub>5</sub>D<sub>5</sub>N) spectrum of versipelostatin C (3)

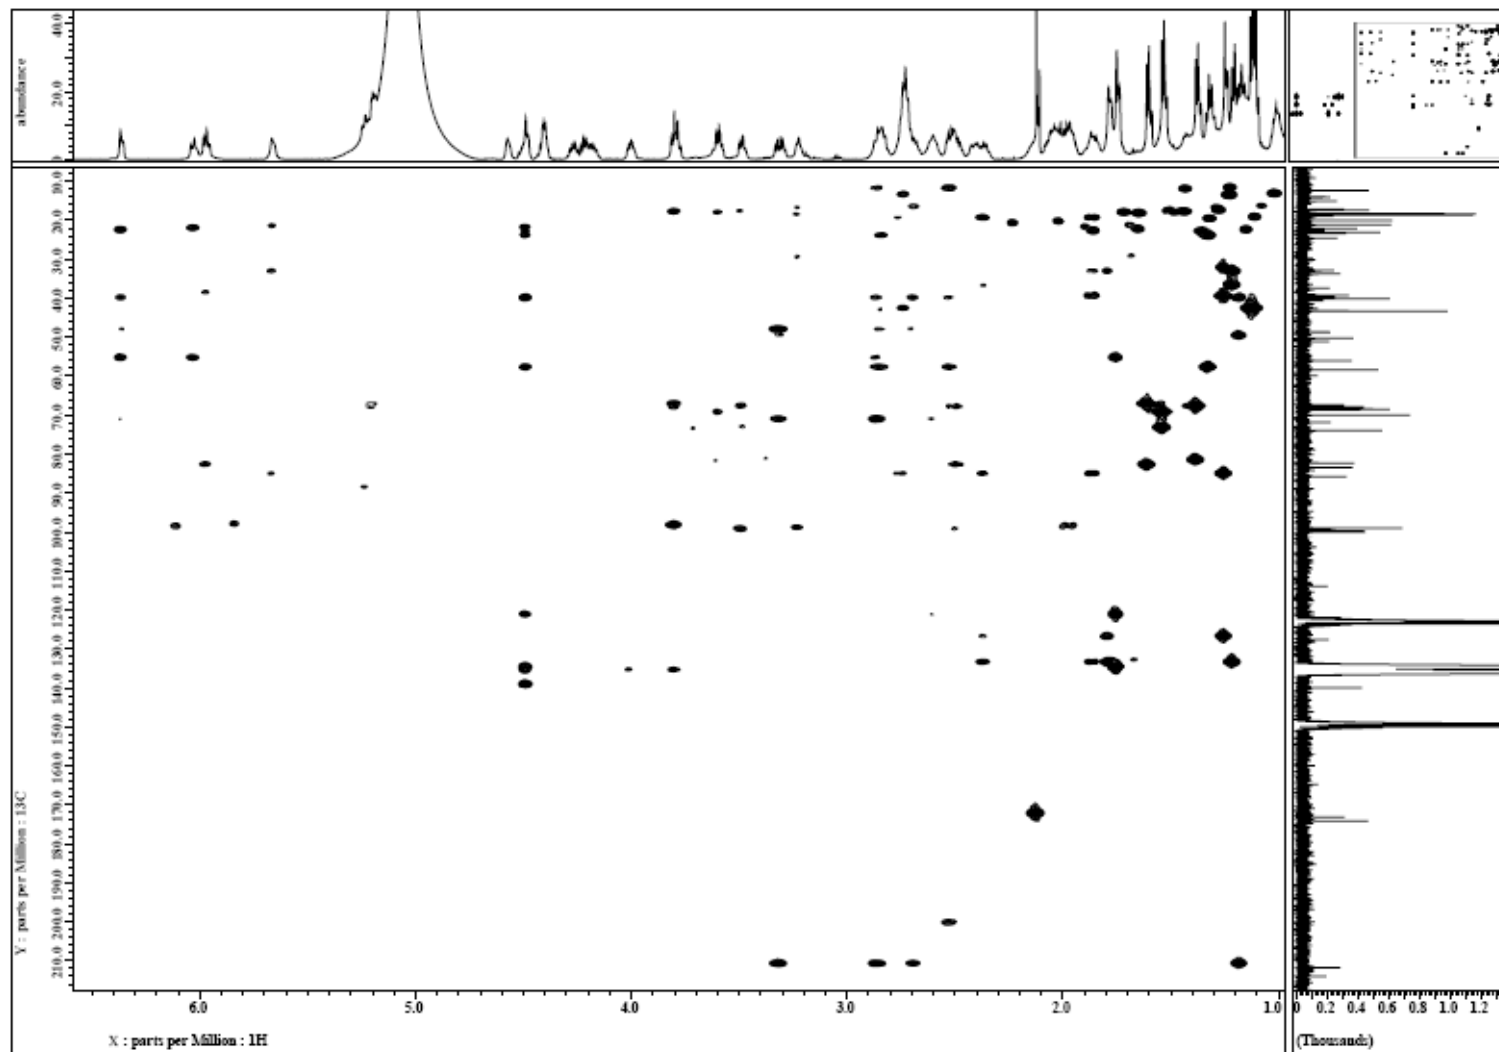

Fig. S11  $^1\text{H}$  NMR (600 MHz,  $\text{CDCl}_3/\text{CD}_3\text{OD}$ ) spectrum of versipelostatin D (4)

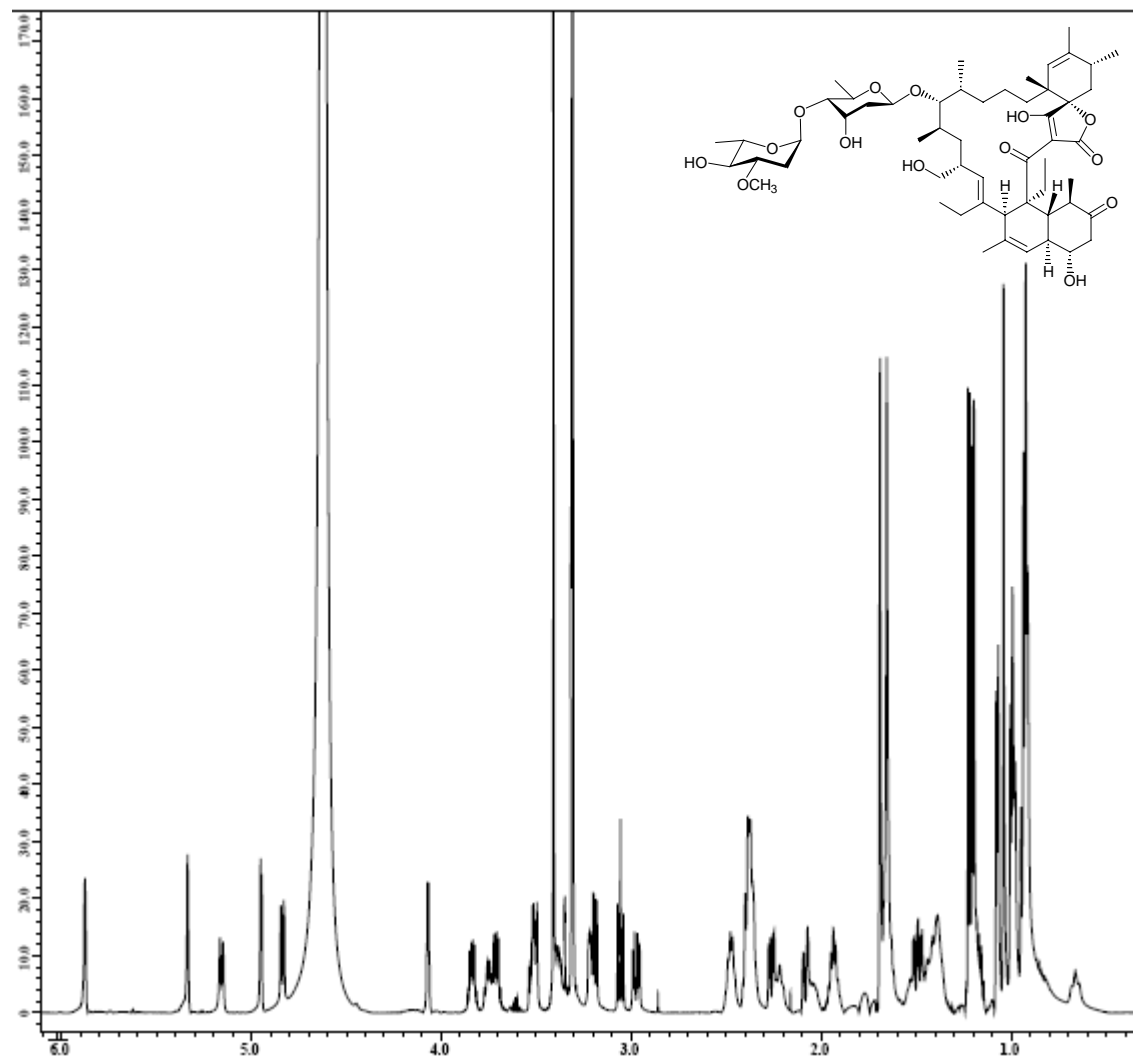

**Fig. S12**  $^{13}\text{C}$  NMR (150 MHz,  $\text{CDCl}_3/\text{CD}_3\text{OD}$ ) spectrum of versipelostatin D (4)

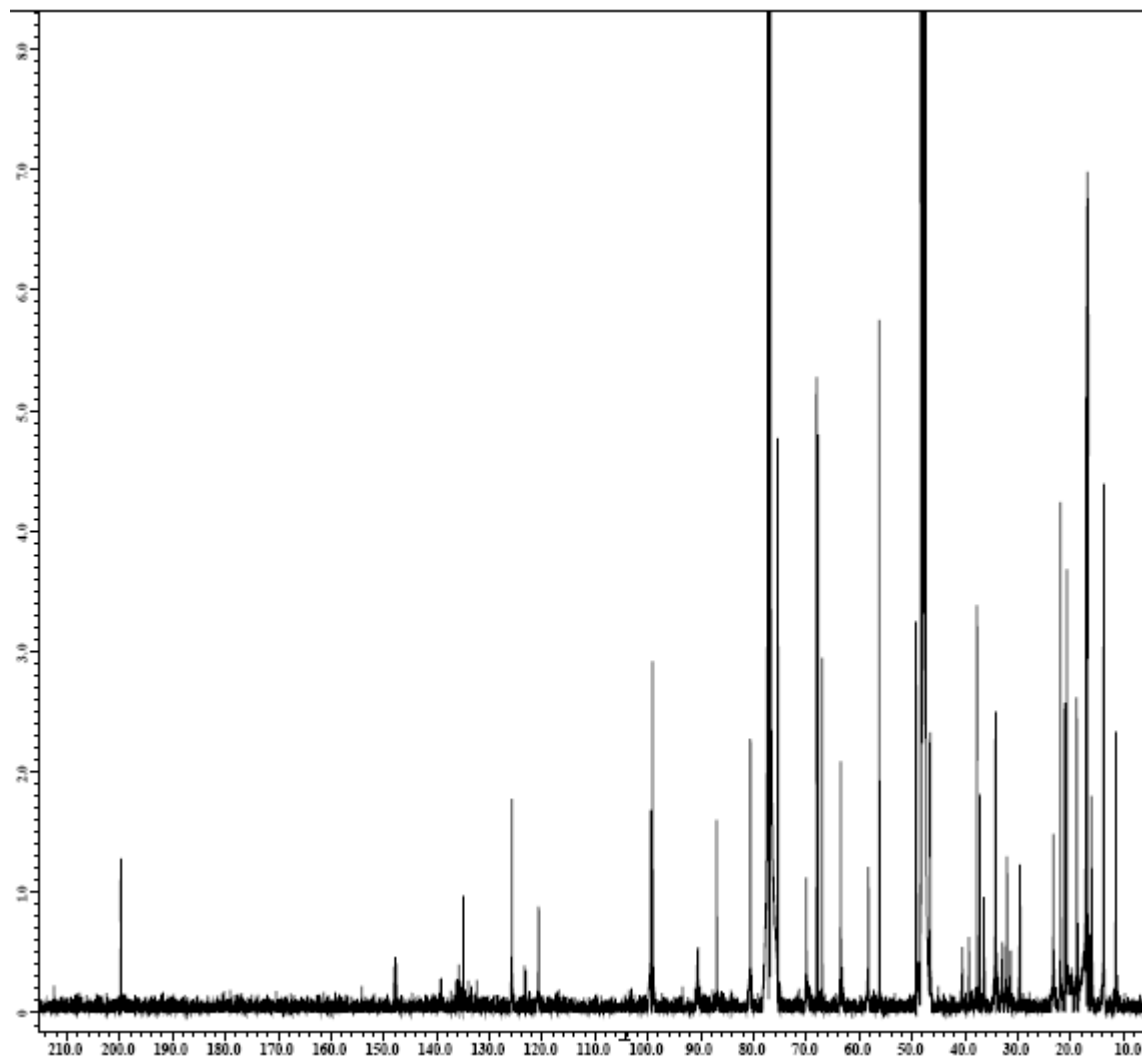



**Fig. S13** HSQC (600 MHz, CDCl<sub>3</sub>/CD<sub>3</sub>OD) spectrum of versipelostatin D (4)

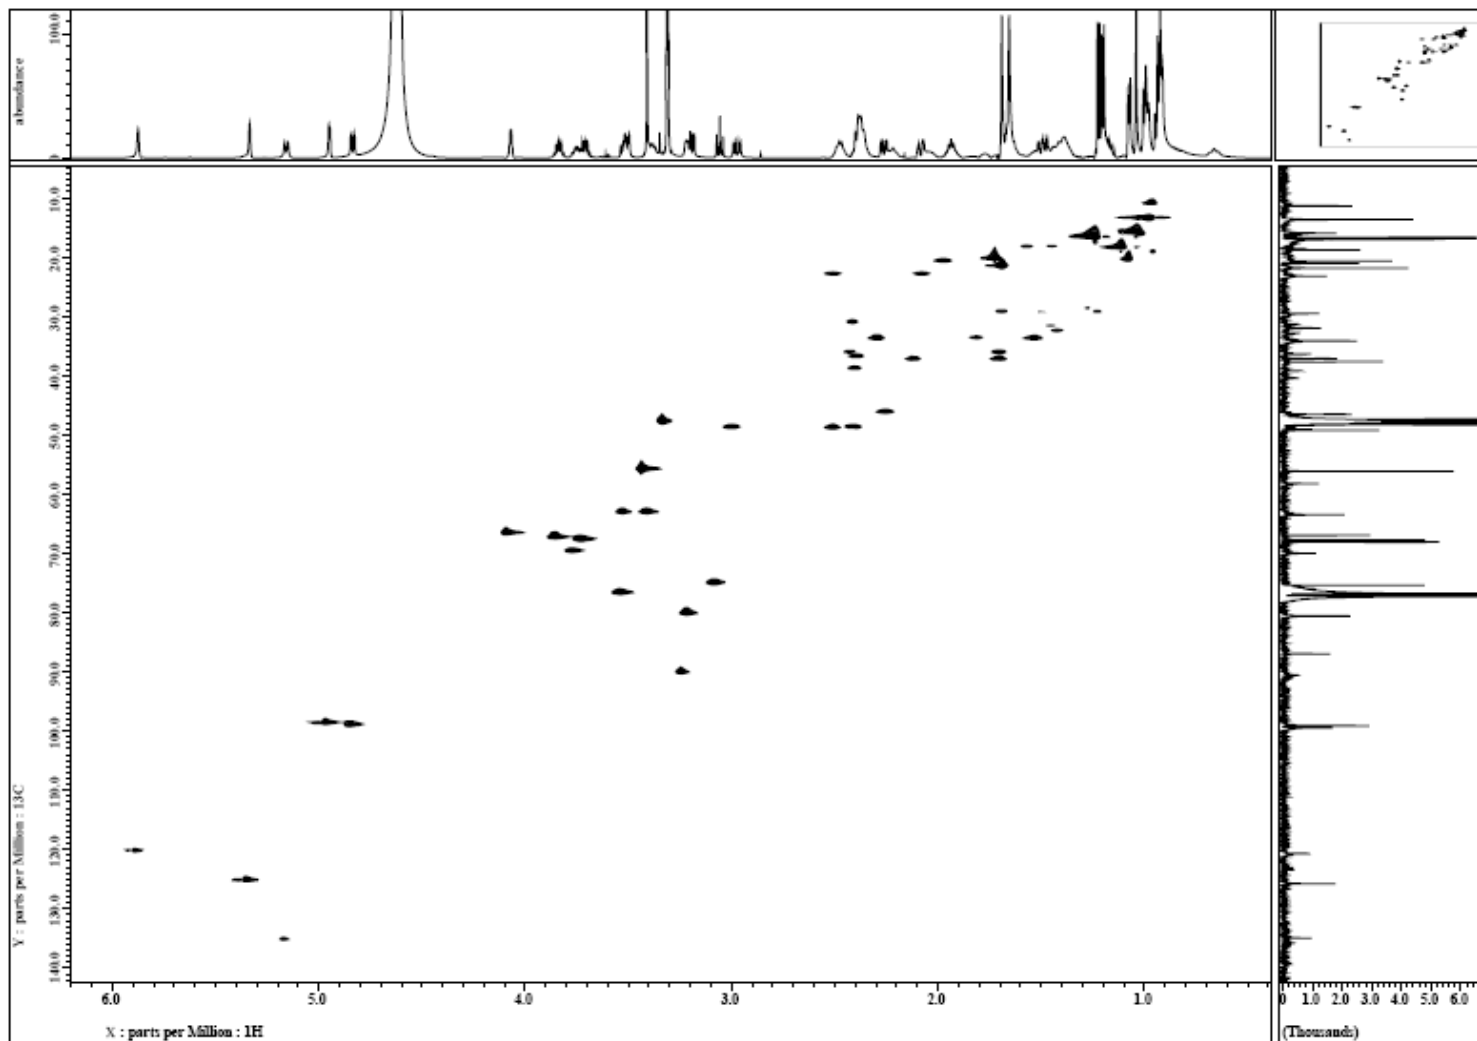

Fig. S14 DQF-COSY (600 MHz, CDCl<sub>3</sub>/CD<sub>3</sub>OD) spectrum of versipelostatin D (4)

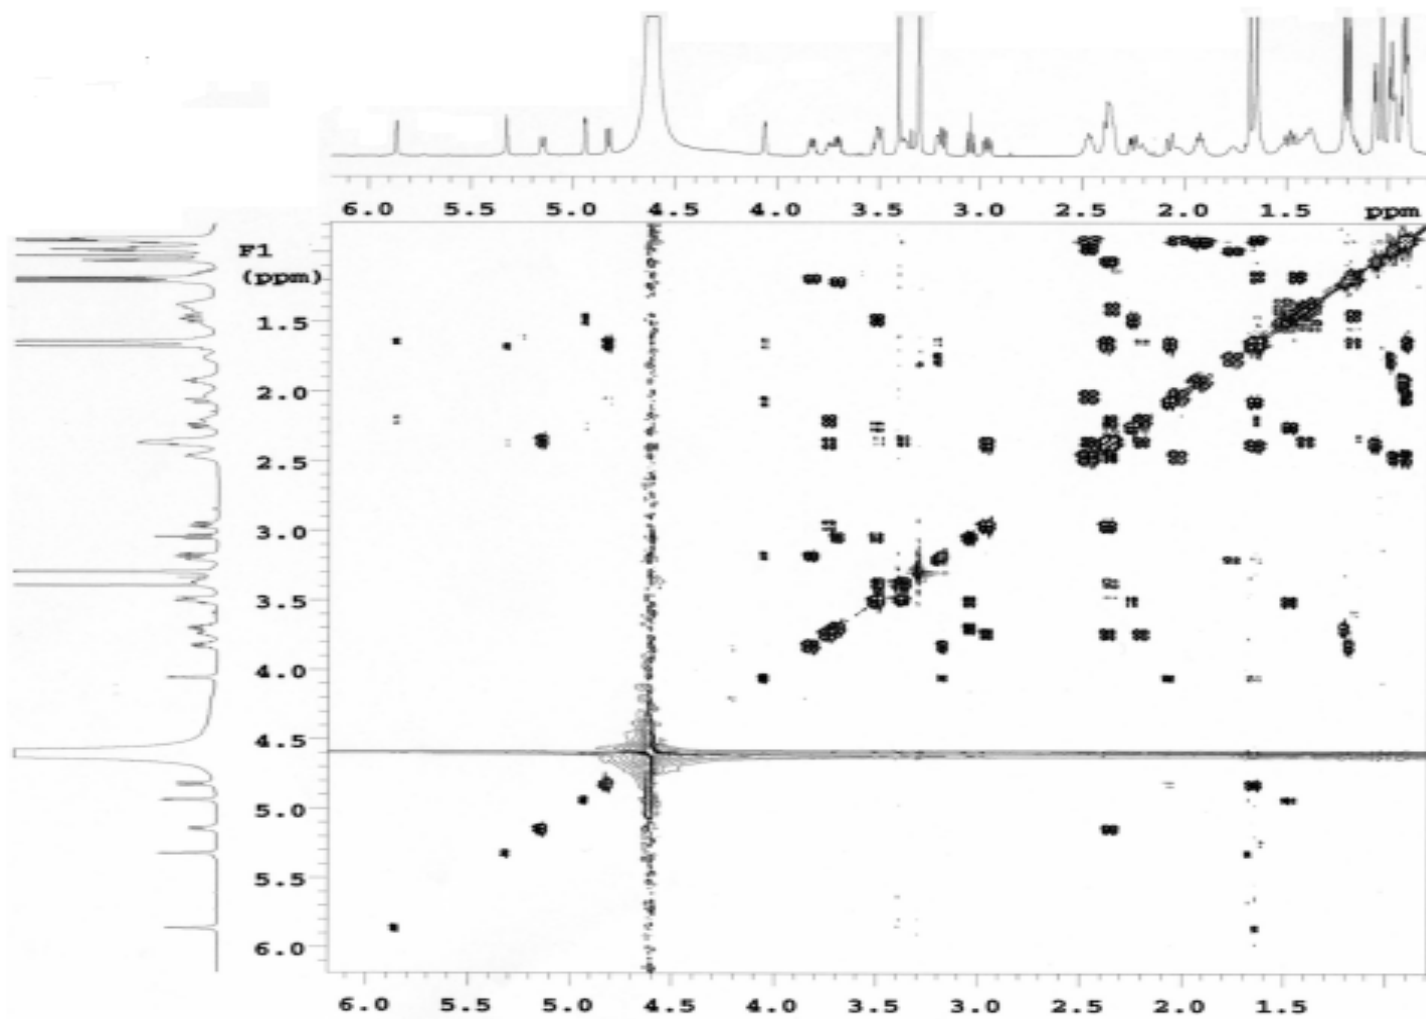

**Fig. S15** HMBC (600 MHz, CDCl<sub>3</sub>/CD<sub>3</sub>OD) spectrum of versipelostatin D (4)

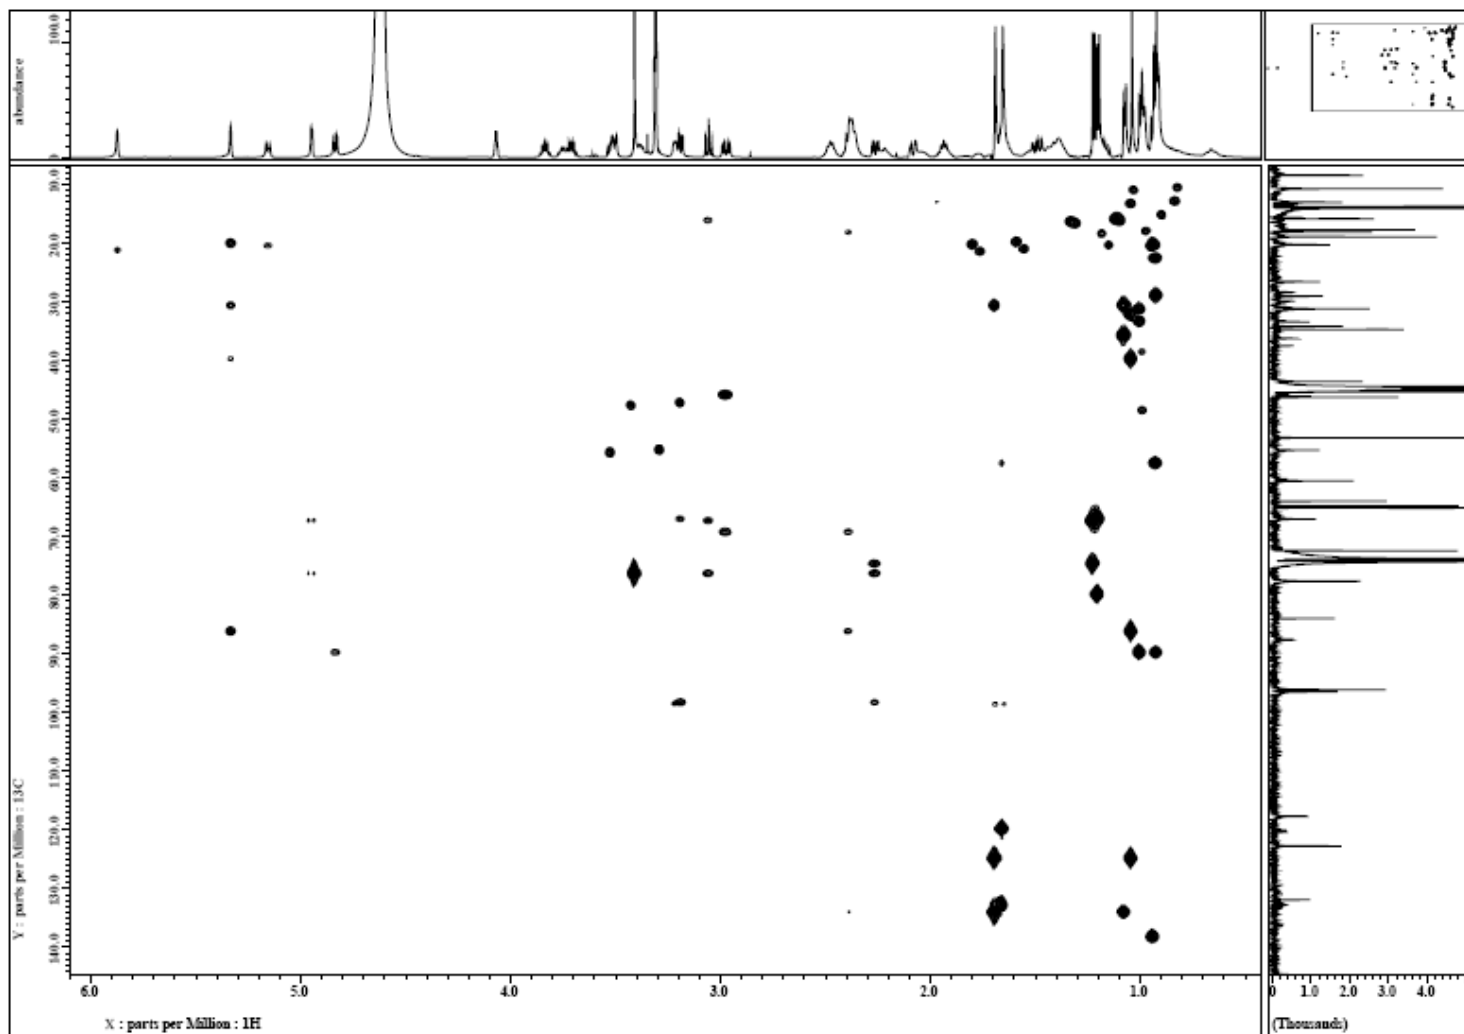

**Fig. S16**  $^1\text{H}$  NMR (600 MHz,  $\text{CDCl}_3$ ) spectrum of versipelostatin E (5)

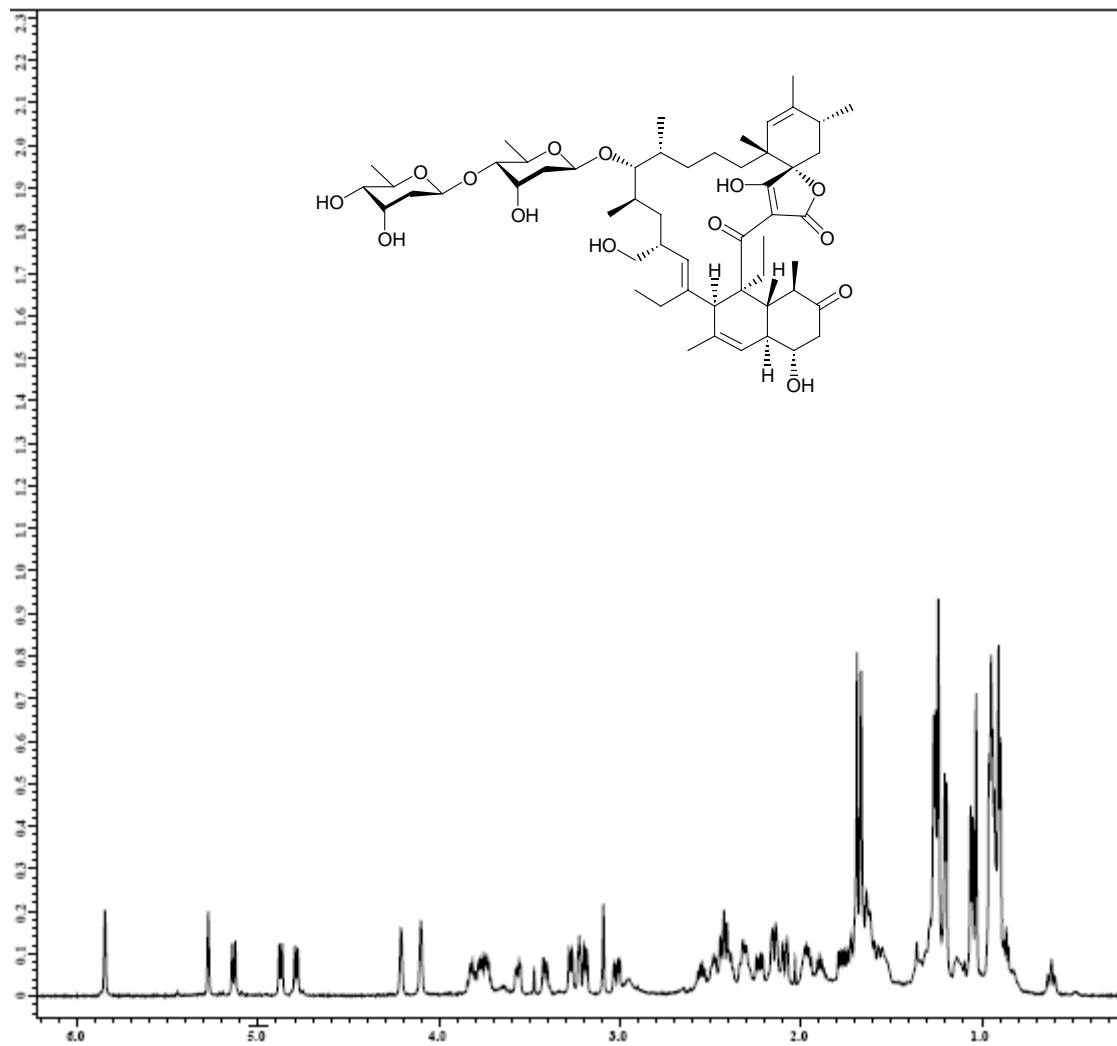

**Fig. S17**  $^{13}\text{C}$  NMR (150 MHz,  $\text{CDCl}_3$ ) spectrum of versipelostatin E (5)

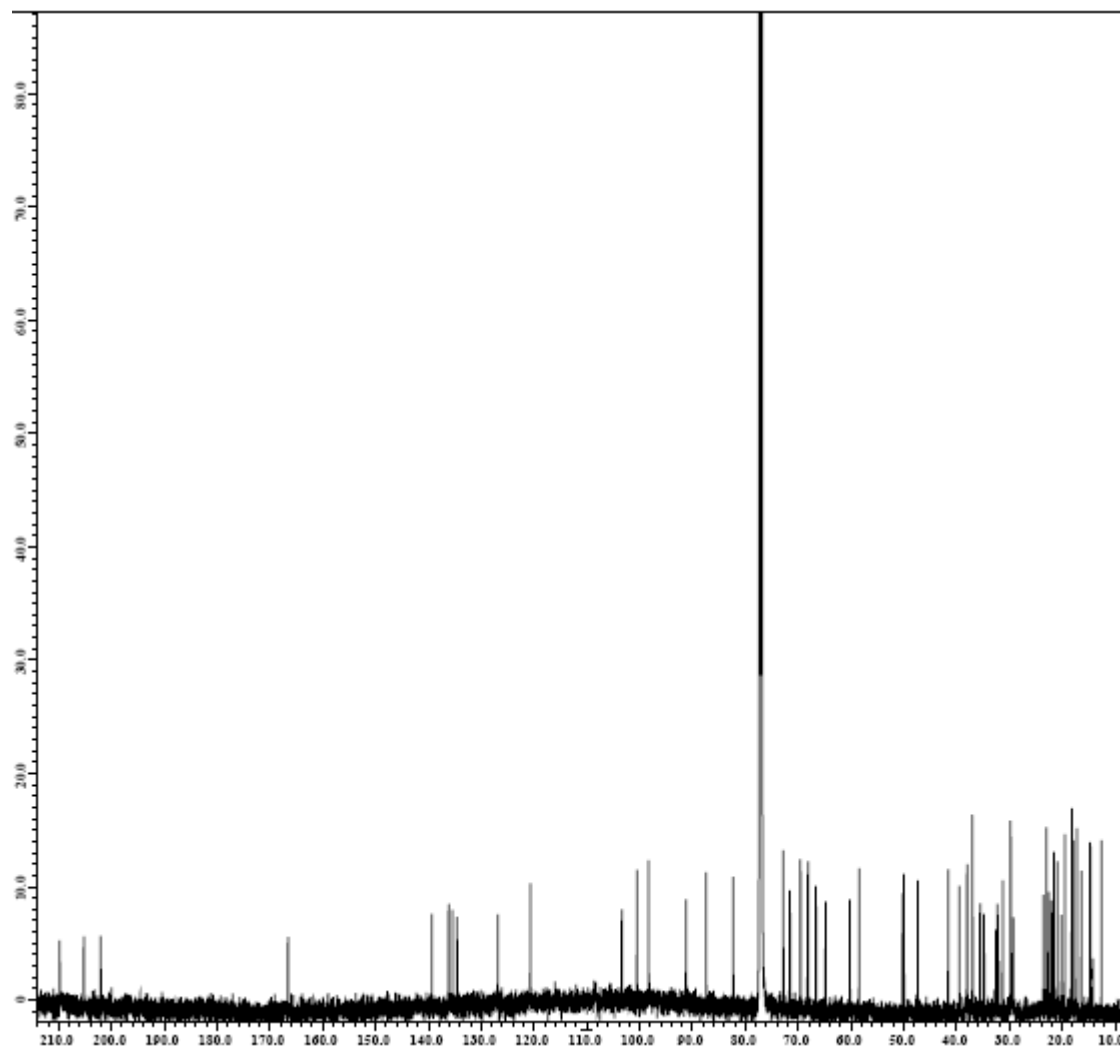

**Fig. S18** HSQC (600 MHz, CDCl<sub>3</sub>) spectrum of versipelostatin E (5)

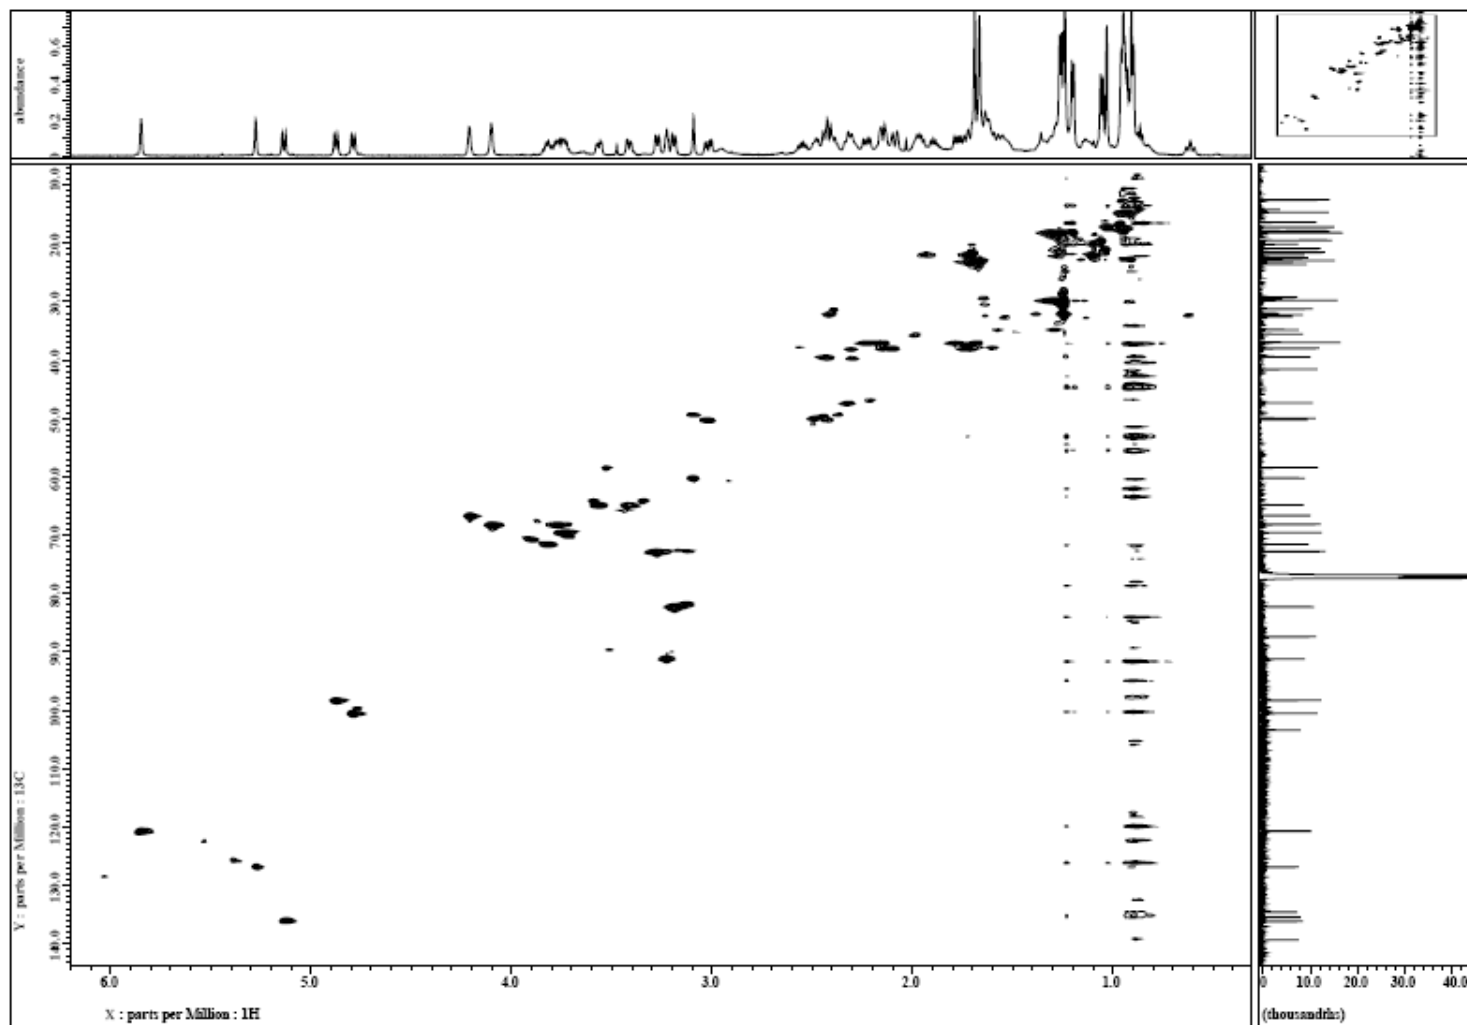

Fig. S19 DQF-COSY (600 MHz,  $\text{CDCl}_3$ ) spectrum of versipelostatin E (5)

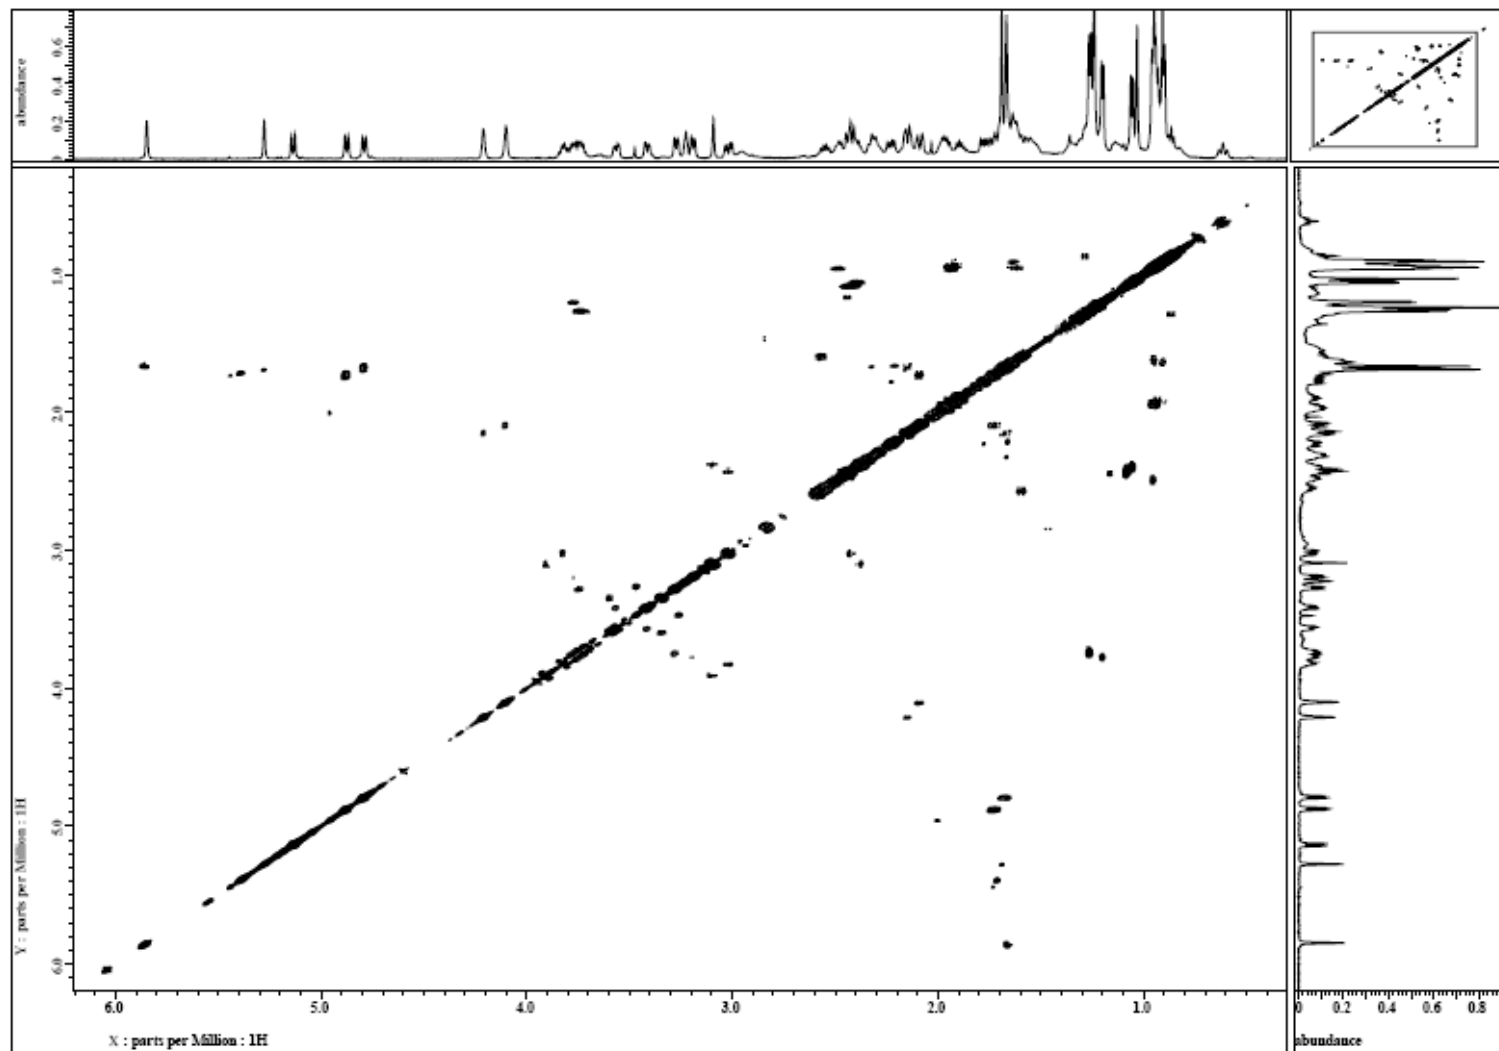

Fig. S20 HMBC (600 MHz, CDCl<sub>3</sub>) spectrum of versipelostatin E (5)

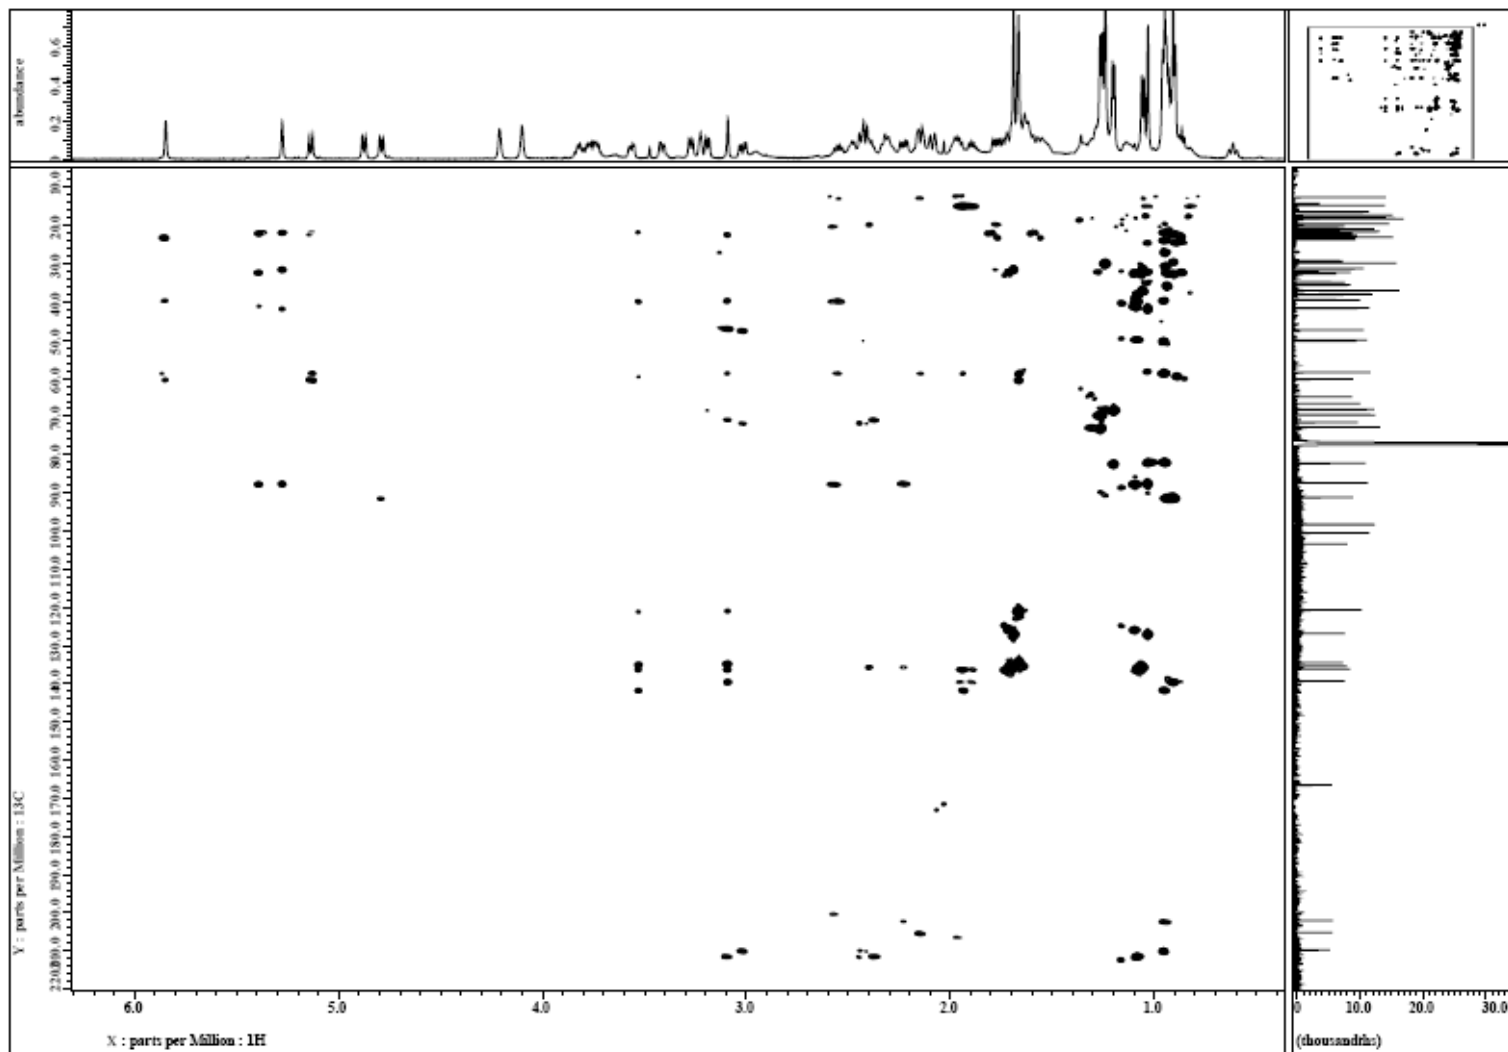

Supplement: b817312e.pdf [file b817312e.pdf]
